# Supplementary material for: Silicon via fertigation with and without potassium application, improve physiological aspects of common beans cultivated under three water regimes in field
Source: PubMed Central journal article supplement (PMC10808205; doi:10.1038/s41598-024-52503-8), 2024-01-24
Supplement: 41598_2024_52503_MOESM1_ESM.pdf [file 41598_2024_52503_MOESM1_ESM.pdf]

**Table1. Climate history of the last 30 years**

| <b>Years</b>               | <b>Min.<br/>Temp.<br/>(°C)</b> | <b>Max.<br/>Temp. (°C)</b> | <b>Med.<br/>Temp. (°C)</b> | <b>R.H.<br/>(%)</b> | <b>Radiation<br/>Global<br/>(MJ m<sup>-2</sup>)</b> | <b>Precipitation<br/>Total (mm)</b> |
|----------------------------|--------------------------------|----------------------------|----------------------------|---------------------|-----------------------------------------------------|-------------------------------------|
| 1992                       | 17,1                           | 28,3                       | 21,9                       | 75,80               | -                                                   | 1411,00                             |
| 1993                       | 17,1                           | 29,1                       | 22,2                       | 73,53               | -                                                   | 1710,50                             |
| 1994                       | 17,1                           | 30,2                       | 22,7                       | 68,12               | -                                                   | 1055,60                             |
| 1995                       | 17,4                           | 29,7                       | 22,6                       | 70,00               | -                                                   | 1552,10                             |
| 1996                       | 16,8                           | 29,2                       | 22,1                       | 72,13               | -                                                   | 1286,30                             |
| 1997                       | 17,0                           | 29,5                       | 22,3                       | 71,59               | -                                                   | 1429,40                             |
| 1998                       | 17,3                           | 29,6                       | 22,6                       | 73,77               | -                                                   | 1291,70                             |
| 1999                       | 16,6                           | 29,9                       | 22,2                       | 68,76               | -                                                   | 1526,50                             |
| 2000                       | 16,9                           | 29,7                       | 22,6                       | 69,67               | -                                                   | 1207,80                             |
| 2001                       | 17,1                           | 29,7                       | 22,6                       | 70,68               | -                                                   | 1265,40                             |
| 2002                       | 17,7                           | 30,4                       | 23,1                       | 68,46               | -                                                   | 1536,20                             |
| 2003                       | 17,0                           | 30,0                       | 22,5                       | 69,40               | -                                                   | 1262,30                             |
| 2004                       | 16,9                           | 29,2                       | 22,0                       | 71,58               | -                                                   | 1519,10                             |
| 2005                       | 17,5                           | 29,7                       | 22,6                       | 72,05               | -                                                   | 1230,20                             |
| 2006                       | 17,2                           | 29,7                       | 22,5                       | 70,58               | -                                                   | 1447,20                             |
| 2007                       | 17,4                           | 30,0                       | 22,8                       | 69,68               | 18,75                                               | 1585,70                             |
| 2008                       | 17,1                           | 29,5                       | 22,2                       | 72,35               | 18,12                                               | 1412,40                             |
| 2009                       | 17,7                           | 29,4                       | 22,5                       | 76,11               | 17,65                                               | 1735,70                             |
| 2010                       | 17,0                           | 30,2                       | 22,6                       | 70,24               | 19,28                                               | 1225,00                             |
| 2011                       | 17,0                           | 29,7                       | 22,4                       | 70,07               | 17,69                                               | 1615,70                             |
| 2012                       | 17,3                           | 30,0                       | 22,8                       | 69,60               | 17,86                                               | 1179,10                             |
| 2013                       | 17,1                           | 29,4                       | 22,2                       | 72,51               | 17,68                                               | 1453,40                             |
| 2014                       | 17,3                           | 30,8                       | 23,1                       | 66,48               | -                                                   | 814,60                              |
| 2015                       | 18,1                           | 30,2                       | 23,1                       | 72,84               | -                                                   | 1711,90                             |
| 2016                       | 17,2                           | 30,1                       | 22,6                       | 70,60               | -                                                   | 1610,90                             |
| 2017                       | 17,3                           | 30,1                       | 22,8                       | 67,58               | 19,51                                               | 1207,20                             |
| 2018                       | 17,6                           | 30,4                       | 23,0                       | 67,76               | 18,70                                               | 1118,50                             |
| 2019                       | 17,9                           | 30,8                       | 23,5                       | 67,59               | 19,19                                               | 1129,70                             |
| 2020                       | 17,3                           | 31,0                       | 23,3                       | 64,08               | 18,86                                               | 1156,00                             |
| 2021                       | 17,1                           | 30,7                       | 23,2                       | 63,27               | 18,96                                               | 1050,90                             |
| 2022                       | 17,1                           | 30,0                       | 22,7                       | 66,96               | 18,48                                               | 1323,60                             |
| <b>General<br/>average</b> | <b>17,2</b>                    | <b>29,9</b>                | <b>22,6</b>                | <b>70,12</b>        | <b>18,52</b>                                        | <b>1356,83</b>                      |

(-): Interruption of data collection due to failure and lack of equipment. Annual averages for: temperatures, humidity relative and global radiation.

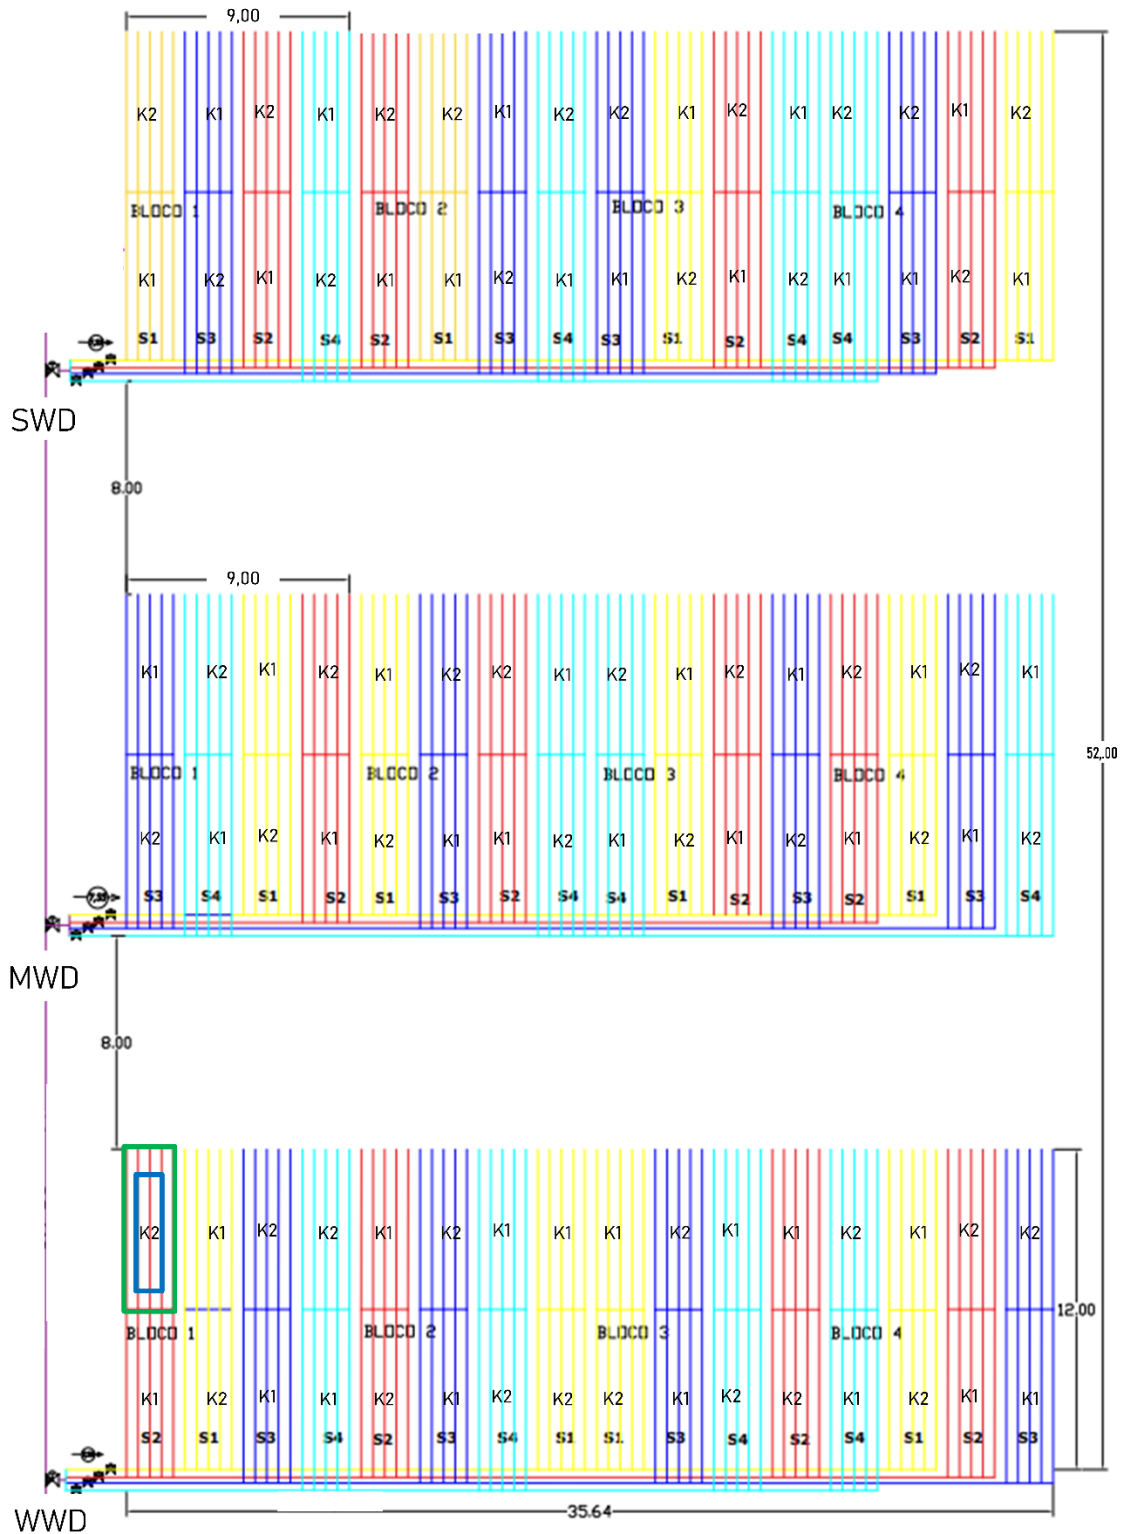

**Figure 1.** Scheme of the irrigation system and experimental design used in the experiment. Green box represents an experimental plot and the blue box determines the useful area, where the plants were selected for evaluation.
